# Supplementary material for: Halanaerobium polyolivorans sp. nov.—A Novel Halophilic Alkalitolerant Bacterium Capable of Polyol Degradation: Physiological Properties and Genomic Insights
Source: MDPI journal article supplement (doi:10.3390/microorganisms11092325), 2023-09-15
Supplement: s1 [file s1]

*Halanaerobium polyolivorans* sp. nov.—A Novel Halophilic Alkalitolerant Bacterium Capable of Polyol Degradation: Physiological Properties and Genomic Insights

Yulia Boltanskaya, Tatjana Zhilina, Denis Grouzdev, Ekaterina Detkova, Nikolay Pimenov and Vadim Kevbrin

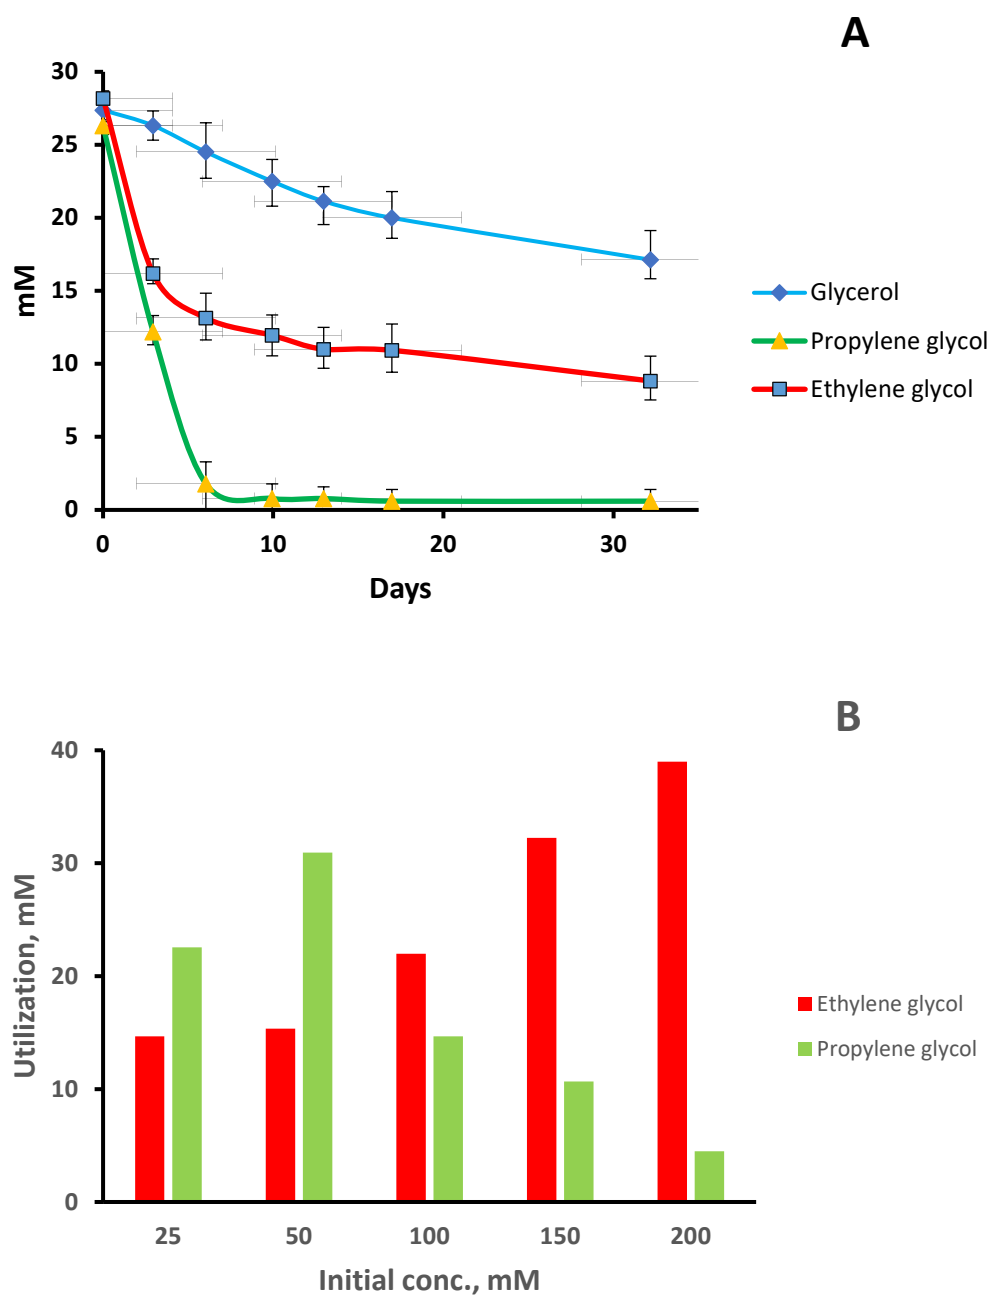

**Figure S1.** (A) Polyol utilization ( $C_{\text{residual}}$ ) by strain Z-7514<sup>T</sup> in course of time at a given initial concentration of 25 mM each; (B) polyol utilization ( $C_{\text{ini}} - C_{\text{fin}}$ ) at given initial concentrations.
